# Supplementary material for: Transcription-independent regulation of STING activation and innate immune responses by IRF8 in monocytes
Source: PubMed Central journal article supplement (PMC9381507; doi:10.1038/s41467-022-32401-1), 2022-08-16
Supplement: 41467_2022_32401_MOESM1_ESM.pdf [file 41467_2022_32401_MOESM1_ESM.pdf]

# Supplementary Information

## **Regulation of STING activation and innate immune responses by IRF8 independent of its transcriptional role in monocytic cells**

Wei-Wei Luo<sup>1</sup>, Zhen Tong<sup>1</sup>, Pan Cao<sup>2</sup>, Fu-Bing Wang<sup>3</sup>, Ying Liu<sup>2</sup>, Zhou-Qin Zheng<sup>1</sup>, Su-Yun Wang<sup>1</sup>, Shu Li<sup>2,3</sup>, Yan-Yi Wang<sup>1\*</sup>

\*Corresponding Author: Dr. Yan-Yi Wang, Email: wangyy@wh.iov.cn

### **This PDF file includes:**

Supplementary Figures 1 to 6

Supplementary Table 1 to 4

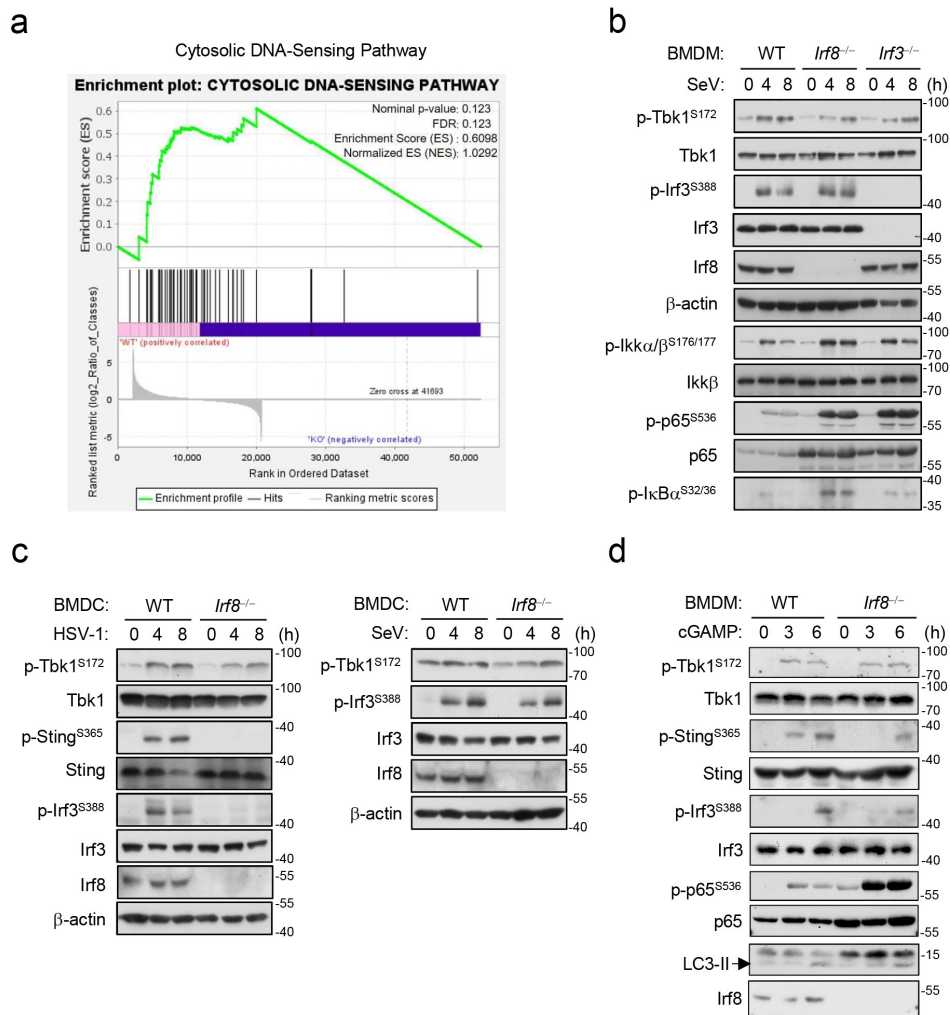

**Supplementary Figure 1. *Irf8*-deficiency does not inhibit SeV-triggered signaling in monocytes.**

**a**, Gene Set Enrichment Analysis (GSEA) enrichment score curves of cytosolic DNA-sensing pathway in WT vs. *Irf8*<sup>-/-</sup> BMDMs.

**b**, Immunoblotting analysis of the indicated proteins in WT, *Irf8*<sup>-/-</sup> or *Irf3*<sup>-/-</sup> BMDMs uninfected or infected with SeV for the indicated times.

**c**, Immunoblot analysis of the indicated proteins in WT and *Irf8*<sup>-/-</sup> BMDCs uninfected or infected with HSV-1(left) or SeV (right) for the indicated times.

**d**, Immunoblotting analysis of the indicated proteins in WT and *Irf8*<sup>-/-</sup> BMDMs un-treated or treated with cGAMP for the indicated times.

Source data are provided as a Source data file.

## Supplementary Figure 2

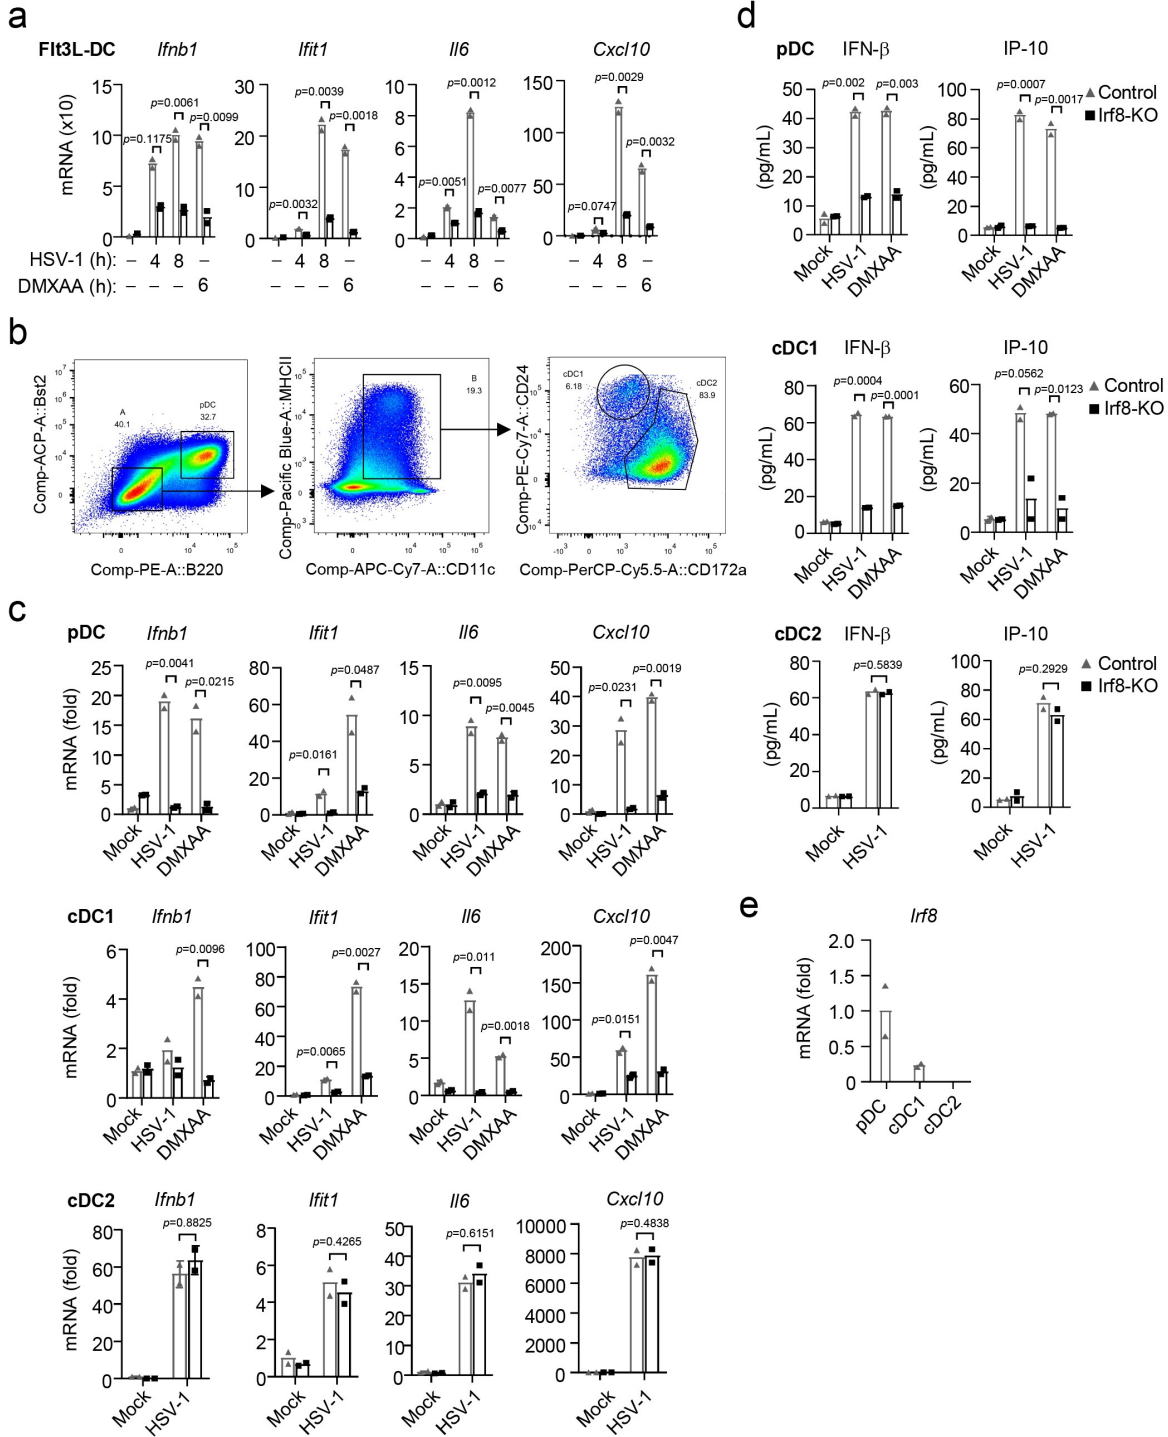

**Supplementary Figure 2. *Irf8* regulates Sting-mediated innate immune responses independent of its role in monocytic cell differentiation.**

**a**, qPCR analysis of *Ifnb1*, *Il6*, *Ifit1* and *Cxcl10* mRNA levels in Flt3L-BMDCs infected with HSV-1 or treated with DMXAA (50 µg/mL) for the indicated times.

**b**, Gating strategy to sort pDC (Bst2<sup>-</sup>B220<sup>+</sup>), cDC1 (Bst2<sup>-</sup>B220<sup>-</sup> CD11c<sup>+</sup> MHCII<sup>+</sup> CD24<sup>+</sup> CD172a<sup>-</sup>) and cDC2 (Bst2<sup>-</sup> B220<sup>-</sup> CD11c<sup>+</sup> MHCII<sup>+</sup> CD172a<sup>+</sup>) cells from C57BL/6 WT mice.

**c**, qPCR analysis of *Ifnb1*, *Il6*, *Ifit1* and *Cxcl10* mRNA levels in the indicated cells infected with HSV-1 or treated with DMXAA (50 µg/mL) for the indicated times.

**d**, ELISA analysis of *Ifn-β* and IP-10 secretion in the indicated cells infected with HSV-1 or treated with DMXAA (50 µg/mL) for 6 hours.

**e**, qPCR analysis of *Irf8* mRNA levels in the indicated cells.

Data in a, c-e are presented as mean, n = 2 biological replicates. Data were analyzed by unpaired two-tailed Student's t-test. Source data are provided as a Source data file.

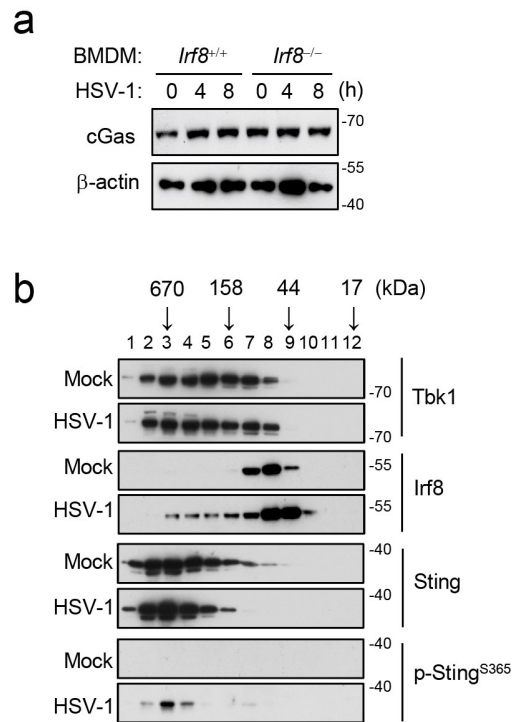

### Supplementary Figure 3. Irf8 acts at the Sting level.

**a**, Immunoblot analysis of the expression of cGas in WT and *Irf8*<sup>-/-</sup> BMDMs un-infected or infected with HSV-1 for the indicated times.

**b**, HSV-1 infection induces complex formation of Irf8, Sting and Tbk1. BMDMs were left uninfected or infected with HSV-1 for 4 hours. Cell lysates were then fractionated by gel filtration chromatography, and the individual fractions were analyzed by immunoblotting with the indicated antibodies. Fraction sizes were calibrated with the gel filtration standard (Bio-Rad 151-1901).

Source data are provided as a Source data file.

## Supplementary Figure 4

**a**

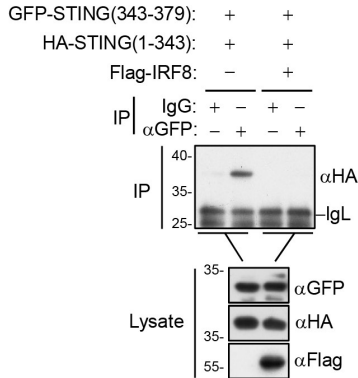

**b**

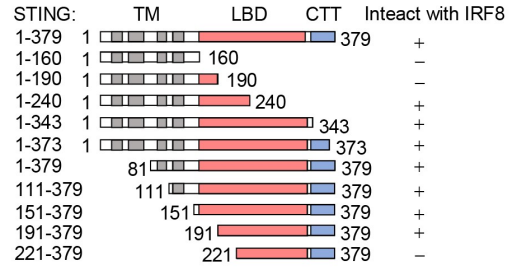

**c**

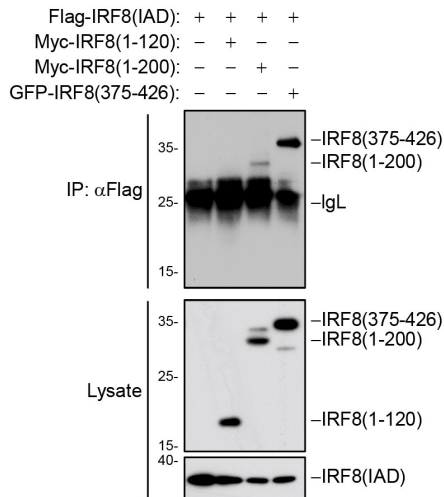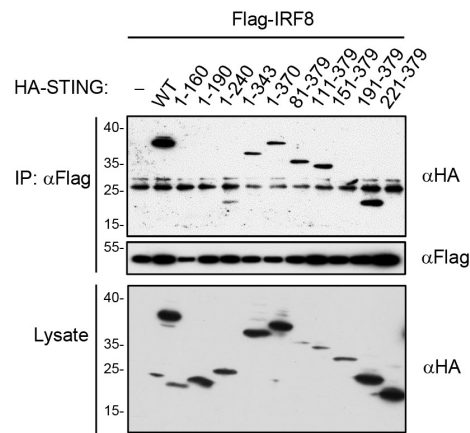

**d**

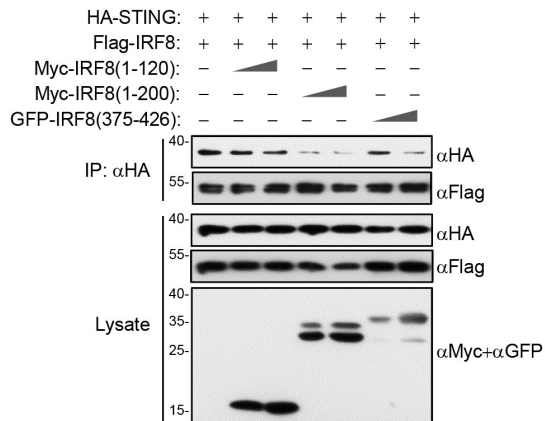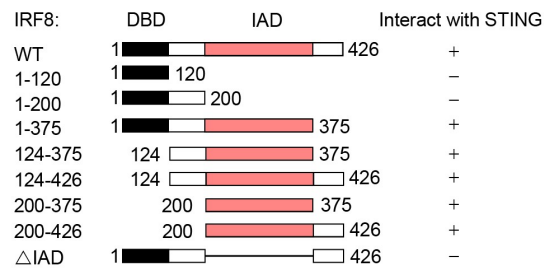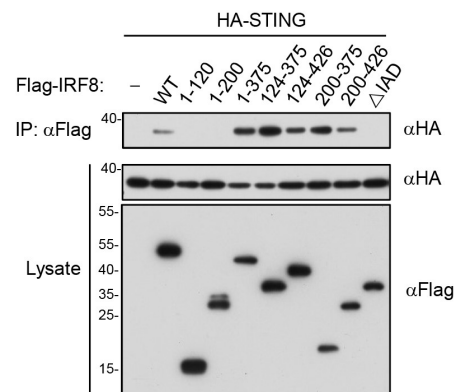

**Supplementary Figure 4. IRF8 exists in an auto-inhibitory status.**

**a,** Effects of IRF8 on auto-inhibition of STING. HEK293T cells were transfected with the indicated plasmids for 24 hours before co-immunoprecipitation and immunoblotting analysis with the indicated antibodies.

**b,** Domain mapping of IRF8 and STING interaction. HEK293 cells were transfected with the indicated truncations before coimmunoprecipitation and immunoblotting analysis with the indicated antibodies. The results were schematically presented (top panel).

**c,** Interaction of IRF8 IAD with its N- and C-terminal domains. HEK293 cells were transfected with the indicated plasmids for 24 hours before coimmunoprecipitation and immunoblotting analysis with the indicated antibodies.

**d,** Effects of N- and C-terminus of IRF8 on its association with STING. HEK293T cells were transfected with the indicated plasmids for 24 hours before coimmunoprecipitation and immunoblotting analysis with the indicated antibodies.

Source data are provided as a Source data file.

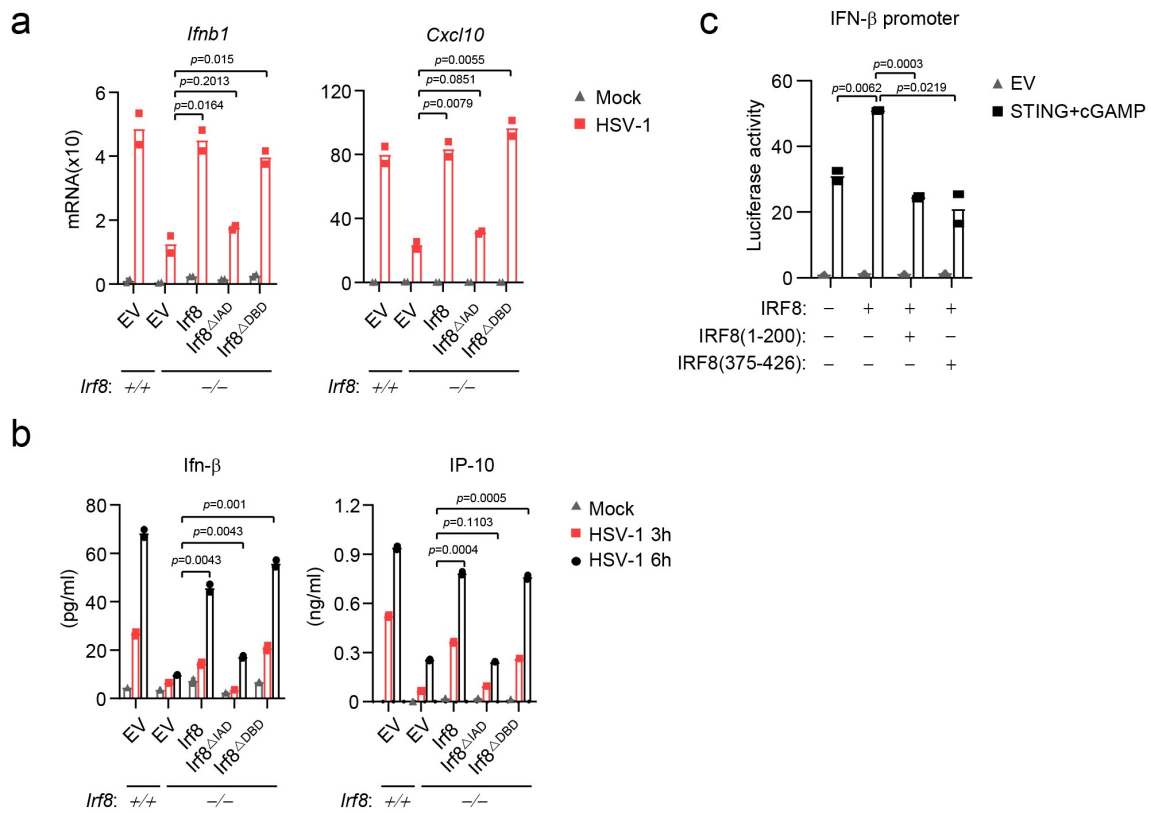

**Supplementary Figure 5. The IAD of Irf8 is necessary for Sting-mediated signaling.**

**a and b**, qPCR analysis of *Ifn-β* and IP10 mRNA levels (**a**) or ELISA analysis of *Ifn-β* and IP-10 secretions (**b**) in wild-type and *Irf8*<sup>-/-</sup> BMDMs reconstituted with the indicated plasmids and infected with HSV-1 for 4 hours (**a**) or the indicated times

**c**, Reporter assays for *IFNB1* promoter activity in HEK293 cells transfected with the indicated plasmids for 24 hours and then treated with 2'3'-cGAMP for 10 hours. EV, empty vector.

Data are presented as mean, (a-b) n = 2 biological replicates, (c) n = 2 technical replicates. Data were analyzed by unpaired two-tailed Student's t-test. Source data are provided as a Source data file.



## Supplementary Figure 6

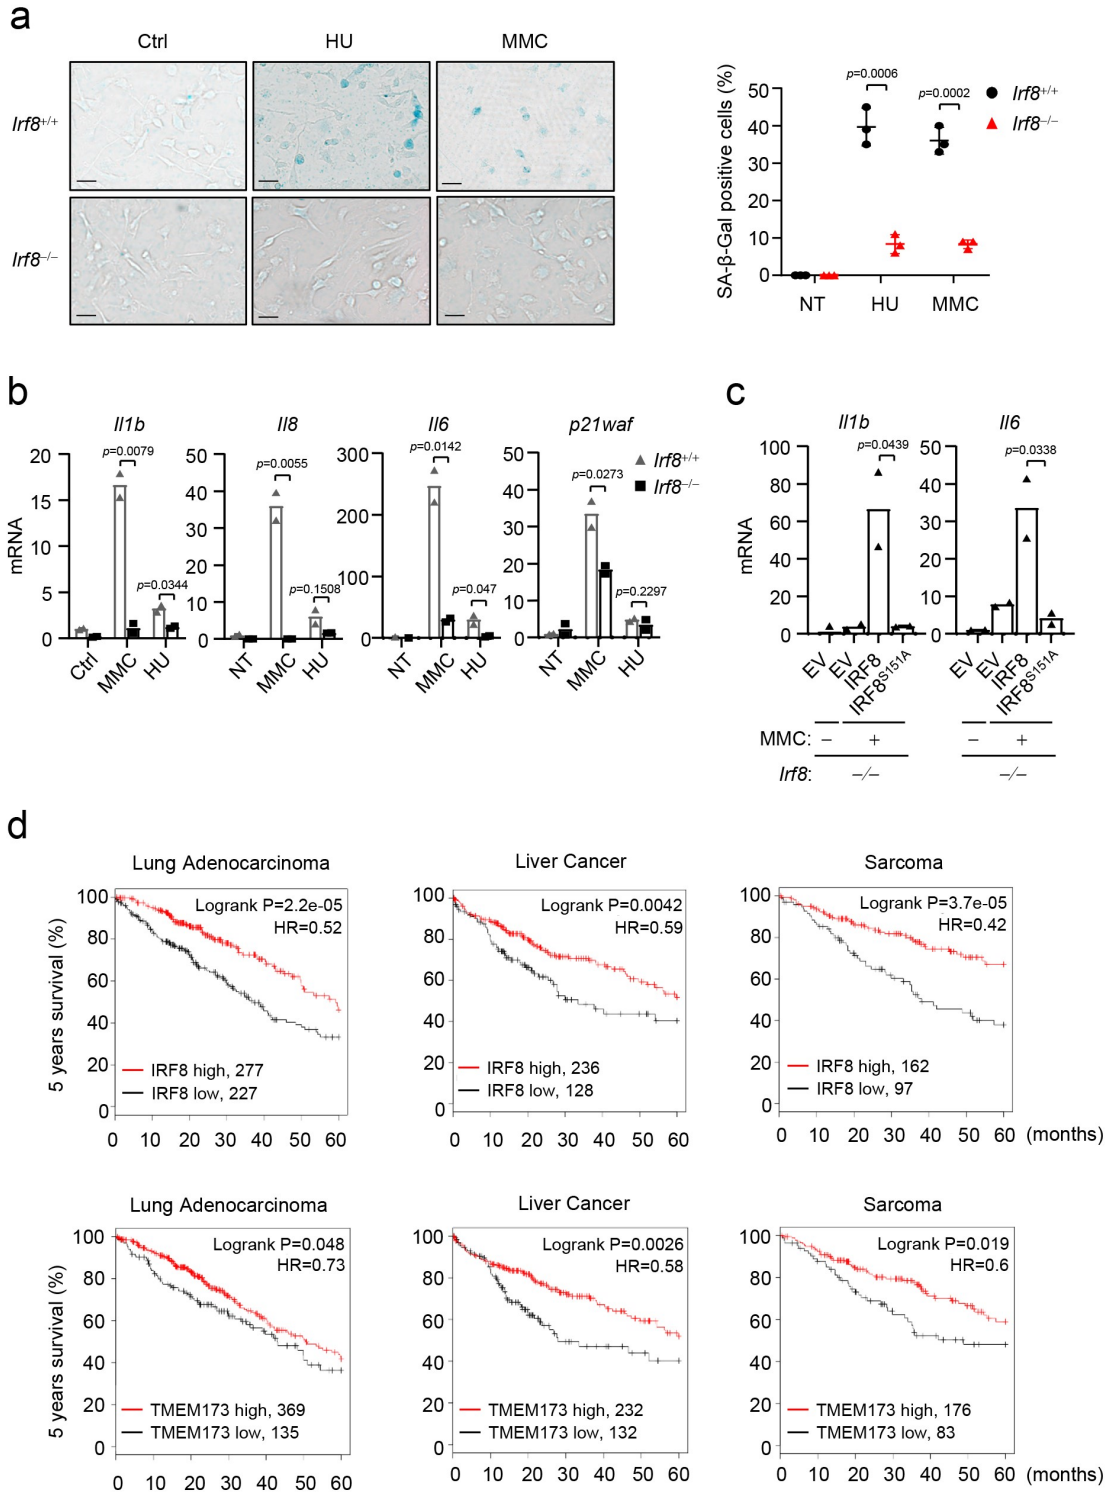

**Supplementary Figure 6. IRF8 is involved in DNA damage-induced senescence and tumorigenesis.**

**a**, SA- $\beta$ -Gal assays for WT and *Irf8*<sup>-/-</sup> BMDMs treated with hydroxyurea (HU, 10 mM) or mitomycin C (MMC, 1  $\mu$ M) for 5 days.  $\beta$ -galactosidase staining positive cells (blue) in at least three randomly selected fields were counted under a microscope (right). Scale bars, 200  $\mu$ m. Graph shows mean  $\pm$  SEM, n=3 independent samples.

**b**, qPCR analysis of the SASP genes in WT and *Irf8*<sup>-/-</sup> BMDMs treated with hydroxyurea (HU, 10 mM) or mitomycin C (MMC, 1  $\mu$ M) for 6 days. NT, untreated.

**c**, qPCR analysis of *Il1b* and *Il6* mRNA levels in wild-type and *Irf8*<sup>-/-</sup> BMDMs reconstituted with the indicated plasmids and treated with mitomycin C (MMC, 1  $\mu$ M) for 6 days.

**d**, IRF8 and STING levels were correlated with beneficial prognosis of cancer patients. Kaplan–Meier survival analysis of IRF8 (top) and STING/TMEM173 (low) in the indicated patients with lung adenocarcinoma, liver cancer or sarcoma. (<http://kmplot.com/analysis/>).

Data in b-c are presented as mean, n = 2 biological replicates. Data were analyzed by unpaired two-tailed Student's t-test. Source data are provided as a Source data file.

**Supplementary Table 1.** A list of DNA oligonucleotides.

|        |                                                                                                                                      |
|--------|--------------------------------------------------------------------------------------------------------------------------------------|
| VACV70 | 5'-CCATCAGAAAGAGGTTTAATATTTTTGTGAGACCATCGAAGAGA<br>GAAAGAGATAAACTTTTTTACGACT-3'                                                      |
| HSV120 | 5'-AGACGGTATATTTTTGCGTTATCACTGTCCCGGATTGGACACGG<br>TCTTGTGGGATAGGCATGCCCAGAAGGCATATTGGGTAAACCCCTT<br>TTATTTGTGGCGGGTTTTTGGAGGACTT-3' |
| DNA90  | 5'-TACAGATCTACTAGTGATCTATGACTGATCTGTACATGATCTAC<br>ATACAGATCTACTAGTGATCTATGACTGATCTGTACATGATCTACA<br>-3'                             |
| ISD:   | 5'-TACAGATCTACTAGTGATCTATGACTGATCTGTACATGATCTAC<br>A-3'.                                                                             |

**Supplementary Table 2.** A list of primary antibodies used in the study.

| Antibody                                                     | Supplier      | Catalog No.                 | Appl. <sup>a</sup> | Usage                  |
|--------------------------------------------------------------|---------------|-----------------------------|--------------------|------------------------|
| Mouse Flag M2 antibody clone M2                              | Sigma-Aldrich | #F3165 Lot: SLCC4005        | WB/IP              | 1:2000/1 $\mu$ g       |
| Mouse HA. 11 Epitope Tag antibody clone 16B12                | BioLegend     | #901515 Lot: B29401         | WB/IF/IP           | 1:2000/1:200/1 $\mu$ g |
| Mouse Myc-Tag antibody clone 9B11                            | CST           | #2276S Lot: 24              | WB                 | 1:2000                 |
| Mouse $\beta$ -actin antibody clone AC-74                    | Sigma-Aldrich | #A2228 Lot: 099M47762       | WB                 | 1:5000                 |
| Mouse $\beta$ -tubulin antibody                              | ABclonal      | #AC021 Lot: 9100010002      | WB                 | 1:5000                 |
| Mouse ICSBP/IRF8 antibody(E-9)                               | Santa Cruz    | SC-365042 Lot: D1917        | WB/IF              | 1:1000/1:200           |
| Mouse GFP antibody(B-2)                                      | Santa Cruz    | SC-9996 Lot: #G3019         | WB                 | 1:2000                 |
| Rabbit TBK1 antibody                                         | Abcam         | ab109735                    | WB                 | 1:1000                 |
| Rabbit phosphor-TBK1 (S172) antibody                         | CST           | #5483S Lot: 13              | WB                 | 1:1000                 |
| Rabbit cGAS antibody                                         | CST           | #31659S Lot: 3              | WB                 | 1:1000                 |
| Rabbit STING antibody                                        | CST           | 13647S Lot: 5               | WB                 | 1:1000                 |
| Rabbit phosphor-STING (S366) antibody                        | CST           | 19781S Lot: 1               | WB                 | 1:1000                 |
| Rabbit phosphor-STING (S365) antibody                        | CST           | #62912S Lot: 1              | WB/IF              | 1:1000/1:100           |
| Rabbit phosphor-IRF3 (S396) antibody                         | CST           | 4947S Lot: 13               | WB                 | 1:500                  |
| Rabbit I $\kappa$ B $\alpha$ antibody                        | CST           | 4812S Lot: 11               | WB                 | 1:1000                 |
| Mouse phosphor-I $\kappa$ B $\alpha$ (S32/36) antibody       | CST           | 9246L Lot: 19               | WB                 | 1:1000                 |
| Rabbit p65 antibody                                          | CST           | 8242S Lot: 9                | WB                 | 1:2000                 |
| Rabbit phosphor-p65 (S536) antibody                          | CST           | 3033S Lot: 17               | WB                 | 1:2000                 |
| Rabbit IKK $\beta$ antibody                                  | CST           | 8943S Lot: 4                | WB                 | 1:1000                 |
| Rabbit phosphor-IKK $\alpha$ (S176)/ $\beta$ (S177) antibody | CST           | 2078S Lot: 9                | WB                 | 1:1000                 |
| Rabbit LC3B antibody                                         | Abcam         | ab192890 Lot: GR-3338049-25 | WB                 | 1:1000                 |
| Rabbit STAT1 antibody(E-23)                                  | Santa Cruz    | SC-346 Lot: #K1115          | WB                 | 1:1000                 |
| Rabbit IRF3 antibody                                         | Proteintech   | 11312-1-AP Lot:00082872     | WB                 | 1:1000                 |

**Supplementary Table 3.** A list of gRNA sequences.

|                   |                            |
|-------------------|----------------------------|
| Human IRF8-gRNA-1 | 5'-GTACAGTGCAGCTAGAAAT-3'  |
| Human IRF8-gRNA-2 | 5'-GTGACCGGAATGGTGGTCGG-3' |

**Supplementary Table 4.** A list of qPCR sequences.

|                       |                                  |
|-----------------------|----------------------------------|
| <i>Actin</i> Forward  | 5'-CATTGCTGACAGGATGCAGAAGG-3'    |
| <i>Actin</i> Reverse  | 5'-TGCTGGAAGGTGGACAGTGAGG-3'     |
| <i>Ifnb1</i> Forward  | 5'-TCCTGCTGTGCTTCTCCACCACA-3'    |
| <i>Ifnb1</i> Reverse  | 5'-AAGTCCGCCCTGTAGGTGAGGTT-3'    |
| <i>Cxcl10</i> Forward | 5'-ATCATCCCTGCGAGCCTATCCT-3'     |
| <i>Cxcl10</i> Reverse | 5'-GACCTTTTTTGGCTAAACGCTTTC-3'   |
| <i>Il1b</i> Forward   | 5'-ACGGACCCCAAAGATGAAG-3'        |
| <i>Il1b</i> Reverse   | 5'-TTCTCCACAGCCACAATGAG-3'       |
| <i>Il8</i> Forward    | 5'-GTCCTTAACCTAGGCATCTTCG-3'     |
| <i>Il8</i> Reverse    | 5'-TCTGTTGCAGTAAATGGTCTCG-3'     |
| <i>Il6</i> Forward    | 5'-TCTGCAAGAGACTTCCATCCAGTTGC-3' |
| <i>Il6</i> Reverse    | 5'-AGCCTCCGACTTGTGAAGTGGT-3'     |
| <i>p21waf</i> Forward | 5'-CAGATCCACAGCGATATCCAG-3'      |
| <i>p21waf</i> Reverse | 5'-AGAGACAACGGCACACTTTG-3'       |
| <i>GAPDH</i> Forward  | 5'-GACAAGCTTCCCGTTCTCAG-3'       |
| <i>GAPDH</i> Reverse  | 5'-GAGTCAACGGATTTGGTGGT-3'       |
| <i>IFNB1</i> Forward  | 5'-TTGTTGAGAACCTCCTGGCT-3'       |
| <i>IFNB1</i> Reverse  | 5'-TGACTATGGTCCAGGCACAG-3'       |
| <i>IFIT1</i> Forward  | 5'-TCATCAGGTCAAGGATAGTC-3'       |
| <i>IFIT1</i> Reverse  | 5'-CCACACTGTATTTGGTGTCTACG-3'    |
| <i>CXCL10</i> Forward | 5'-GGTGAGAAGAGATGTCTGAATCC-3'    |
| <i>CXCL10</i> Reverse | 5'-GTCCATCCTTGAAGCACTGCA-3'      |
| <i>Il12b</i> Forward  | 5'-ATGGCCATGTGGGAGCTGGAG-3'      |
| <i>Il12b</i> Reverse  | 5'-TTTGGTGCTTCACACTTCAGG-3'      |
